# Supplementary material for: KAT6B May Be Applied as a Potential Therapeutic Target for Glioma
Source: PubMed Central journal article supplement (PMC9007634; doi:10.1155/2022/2500092), 2022-04-06

Figure S1

A

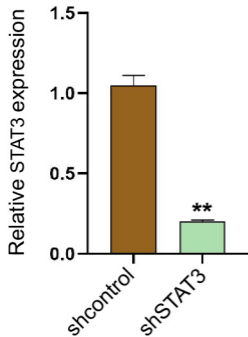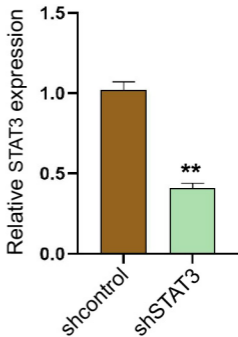

Supplement: 2500092.f1.pdf [file 2500092.f1.pdf]
